# Supplementary material for: Sequence-structure relationships, expression profiles, and disease-associated mutations in the paralogs of phosphoglucomutase 1
Source: PubMed Central journal article supplement (PMC5570346; doi:10.1371/journal.pone.0183563), 2017-08-24
Supplement: pone.0183563.s001.pdf [file pone.0183563.s001.pdf]

# Fig. S1

**A** **WT PGM3**  
MDLGAITKYSALHAKPNGLIILQYGTAGFRTKAEHLDHVMFRMGLLAVLRSKQT **KSTIGVM**  
**VTASHNPEEDNGVKLVDP**LGEMLAPSWEEHATCLANAEEQDMQRVLIDI SEKEA **VNLQDA**  
**AFVVI**GRDTRPSSEKLSQSVIDGVTVLGGQFHDYGLLTPQLHYMVYCR **NTGGRYGKATI**  
EGYYQKLSKAFVELTKQASCSGDEYRSLKVDCANGIGALKLREMEHYFSQGLSVQLFNDG  
SKGKLNHLGADDFVKSHQKPPQGMEIKSNERCCSFDGDADRIVYYYHDADGHFHLIDGDK  
IATLISSFLKELLVEIGESLNIGVVQTAYANGSSSTRYLEEVMKVPVYCTKTGVKHLHKA  
QEFDIGVYFEANGHTALFSTAVEMKIKQSAEQLEDKRRKAAKMLENI IDLFNQAAAGDAI  
SDMLVIEAILALKGLTVQQWDALYTDLPNRQLKVQVADRRVISTTDAERQAVTTPGLQEA  
INDLVKKYKLSRAFVRPSGTEDVVRVYAEADSQESADHLAHEVSLAVFQLAGGIGERPQP  
GF

**Rearranged PGM3 (Grouped Segments)**  
MDLGAITKYSALHAKPNGLIILQYGTAGFRTKAEHLDHVMFRMGLLAVLRSKQT **VNLQDA**  
**FVVI**GRDTRPSSEKLSQSVIDGVTVLGGQFHDYGLLTPQLHYMVYCR **KSTIGVMVTASH**  
**NPEEDNGVKLVDP**LGEMLAPSWEEHATCLANAEEQDMQRVLIDI SEKEA **NTGGRYGKATI**  
EGYYQKLSKAFVELTKQASCSGDEYRSLKVDCANGIGALKLREMEHYFSQGLSVQLFNDG  
SKGKLNHLGADDFVKSHQKPPQGMEIKSNERCCSFDGDADRIVYYYHDADGHFHLIDGDK  
IATLISSFLKELLVEIGESLNIGVVQTAYANGSSSTRYLEEVMKVPVYCTKTGVKHLHKA  
QEFDIGVYFEANGHTALFSTAVEMKIKQSAEQLEDKRRKAAKMLENI IDLFNQAAAGDAI  
SDMLVIEAILALKGLTVQQWDALYTDLPNRQLKVQVADRRVISTTDAERQAVTTPGLQEA  
INDLVKKYKLSRAFVRPSGTEDVVRVYAEADSQESADHLAHEVSLAVFQLAGGIGERPQP  
GF

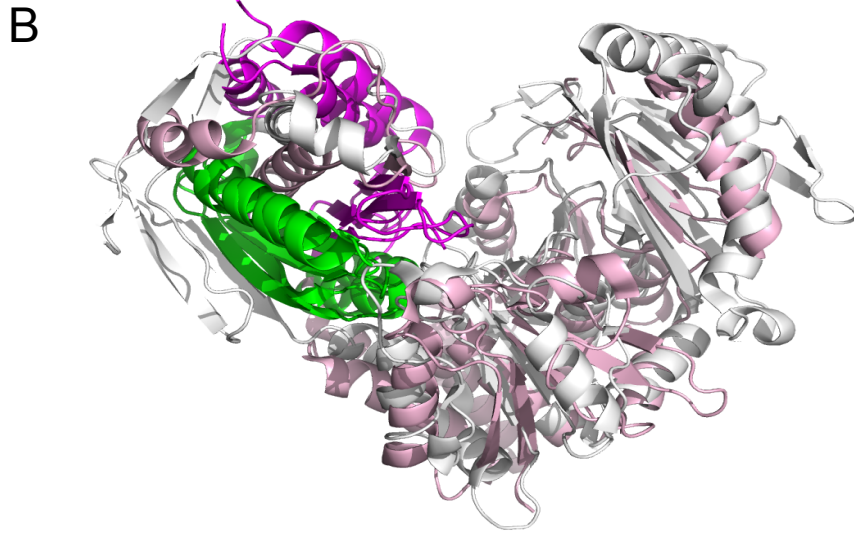

**Fig. S1. Details of the sequence modification made to human PGM3.**

**(A)** Sequences of wild-type and human PGM3 and the modified version used for sequence alignments, showing the transposed regions (see text). Residues highlighted in magenta were swapped with those in green. **(B)** Superposition of human PGM1 (white) and the PGM3 homolog from *C. albicans* (PDB ID 2DKA) (pink). Green/magenta highlight the regions affected by circular permutation (and swapped in the amino acid sequence), showing how they are structurally conserved despite the different sequence connectivity in PGM3.
