# Supplementary material for: Sequence-structure relationships, expression profiles, and disease-associated mutations in the paralogs of phosphoglucomutase 1
Source: PubMed Central journal article supplement (PMC5570346; doi:10.1371/journal.pone.0183563), 2017-08-24
Supplement: pone.0183563.s002.pdf [file pone.0183563.s002.pdf]

Fig. S2

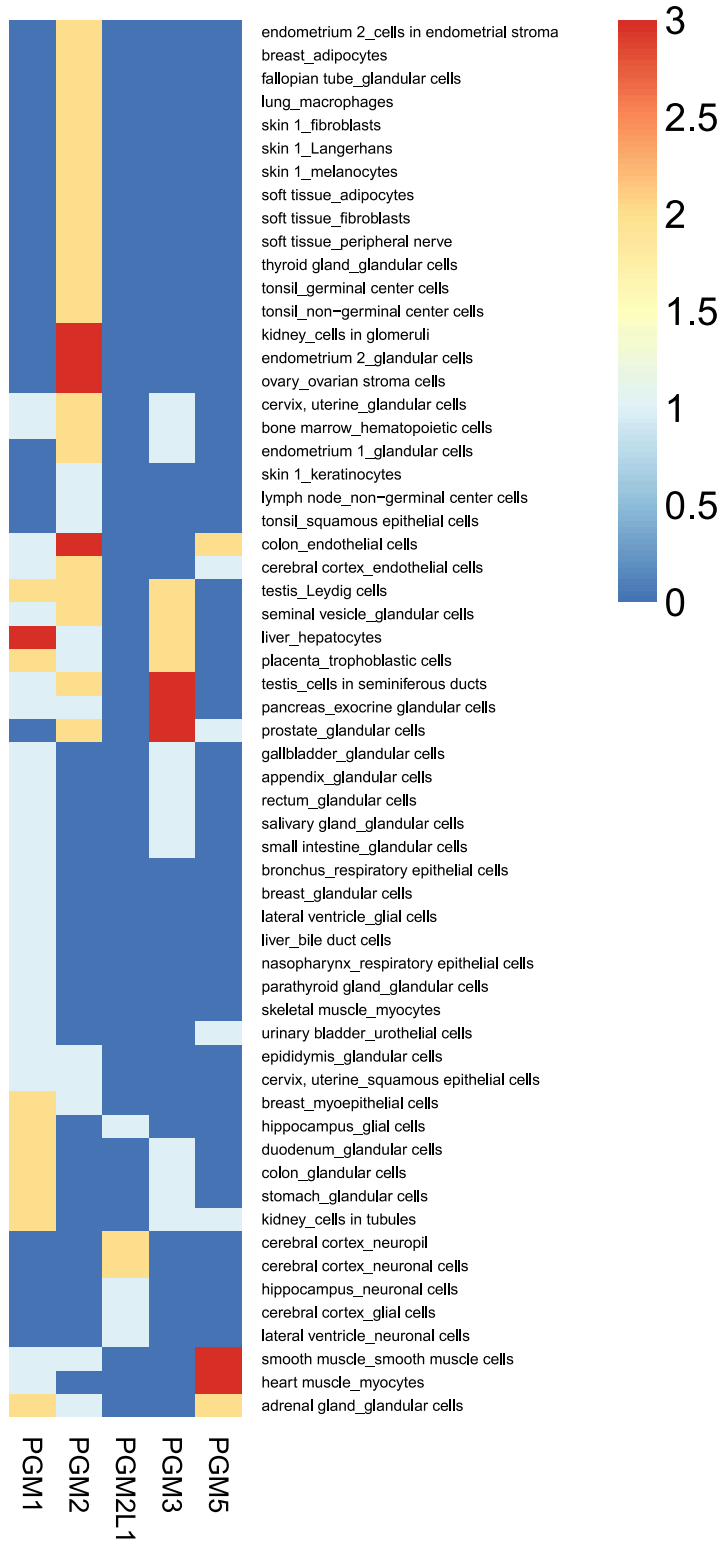

**Fig. S2.** Protein expression data for the PGM paralogs from the Human Protein Atlas (ref) showing data on a wide range of tissues. Data are binned into low (light blue), medium (orange), or high (red) expression. Dark blue indicates no measurable expression; tissues without expression for any paralog were omitted.
