# Supplementary material for: Sequence-structure relationships, expression profiles, and disease-associated mutations in the paralogs of phosphoglucomutase 1
Source: PLOS journal article supplement (doi:10.1371/journal.pone.0183563), 2017-08-24
Supplement: S5 (10.1371/journal.pone.0183563.s005) [file journal.pone.0183563.s005]

**S1 Table. No. of expected vs. observed variants of the PGM1 paralogs and their evolutionary constraint scores**

|                              | PGM1  | PGM2  | PGM2L1 | PGM3  | PGM5  |
|------------------------------|-------|-------|--------|-------|-------|
| <b>Expected no. variants</b> | 208.2 | 175.6 | 191.6  | 155.6 | 171.7 |
| <b>Observed no. variants</b> | 206   | 207   | 128    | 150   | 139   |
| <b>Constraint scores</b>     | 0.08  | -1.16 | 2.25   | 0.22  | 1.22  |

Variant numbers and constraint scores obtained from the ExAc database (see text).

Genes with constraints scores > 0.9 are considered highly intolerant to substitution.
